# Supplementary material for: Phosphorothioate anti-sense oligonucleotides: the kinetics and mechanism of the sulfurisation of phosphites by phenylacetyl disulfide (PADS)
Source: Royal Society of Chemistry journal article supplement (doi:10.1039/c6ob02108e), 2016-01-01

## Electronic Supplemental Information

### Phosphorothioate Anti-sense Oligonucleotides: The Kinetics and Mechanism of the Sulfurisation of Phosphites by Phenylacetyl Disulfide (PADS)

James L. Scotson, Benjamin I. Andrews, Andrew P. Laws and Michael I. Page

#### 1. Brønsted plot for $k_{\text{obs}}$ sulfurisation of $\text{P}(\text{PhO})_3$ with 2,2,2',2'-tetramethyl-2,2'-phenylacetyl disulfide as a function of pyridine $\text{pK}_a$

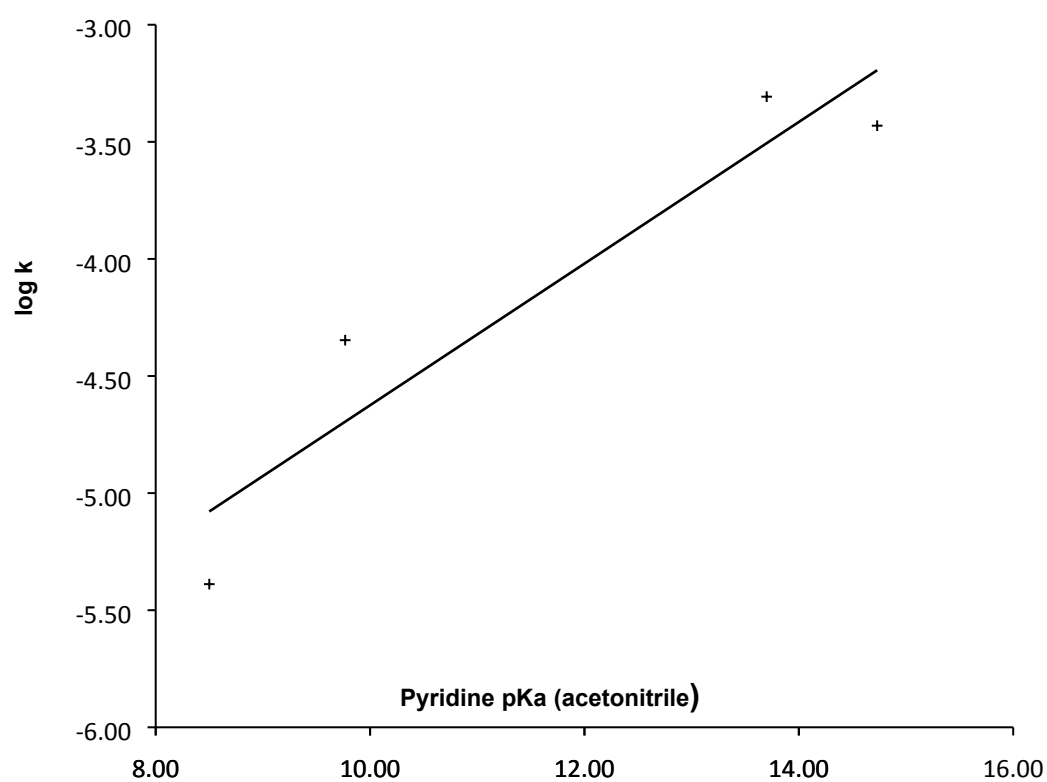

| Substituent | $\text{pK}_a$ ACN | $k_{\text{obs}}$ ( $\text{s}^{-1}$ ) | $\log k$ |
|-------------|-------------------|--------------------------------------|----------|
| 4MeO        | 14.73             | $3.71 \times 10^{-4}$                | -3.43    |
| 3Me         | 13.70             | $4.93 \times 10^{-4}$                | -3.31    |
| 3Cl         | 9.77              | $4.50 \times 10^{-5}$                | -4.35    |
| 4CN         | 8.50              | $4.09 \times 10^{-6}$                | -5.39    |

2. Brønsted plot for  $k_{\text{obs}}$  sulfurisation of  $\text{P}(\text{PhO})_3$  with dibenzoyl disulfide as a function of pyridine  $\text{pK}_a$

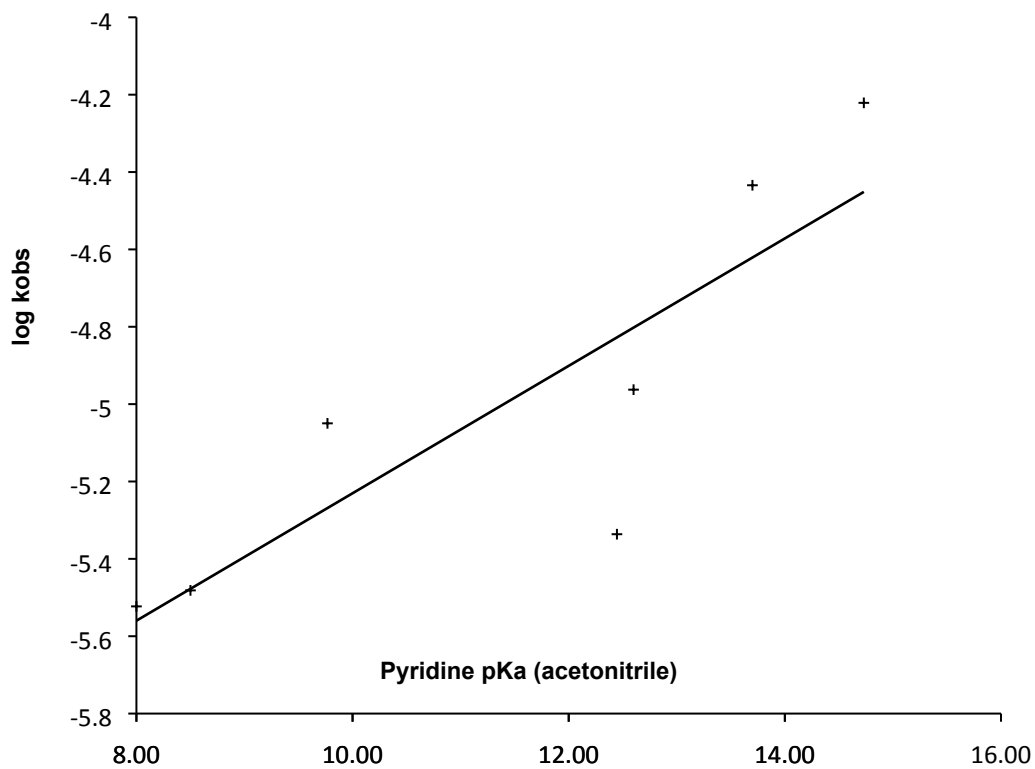

| Substituent | $\text{pK}_a$ ACN | $K_{\text{obs}}$ ( $\text{s}^{-1}$ ) | log k |
|-------------|-------------------|--------------------------------------|-------|
| 4MeO        | 14.73             | $6.01 \times 10^{-5}$                | -4.22 |
| 3Me         | 13.70             | $3.68 \times 10^{-5}$                | -4.43 |
| H           | 12.60             | $1.09 \times 10^{-5}$                | -4.96 |
| 3MeO        | 12.45             | $4.61 \times 10^{-6}$                | -5.34 |
| 3Cl         | <b>9.77</b>       | $8.92 \times 10^{-6}$                | -5.05 |
| 3CN         | 8.00              | $3.00 \times 10^{-6}$                | -5.52 |
| 4CN         | 8.50              | $3.30 \times 10^{-6}$                | -5.48 |

3. Rate of sulfurisation of P(PhO)<sub>3</sub> using fresh PADS in various solvents –plot of log rate constant against dielectric constant  $\epsilon$

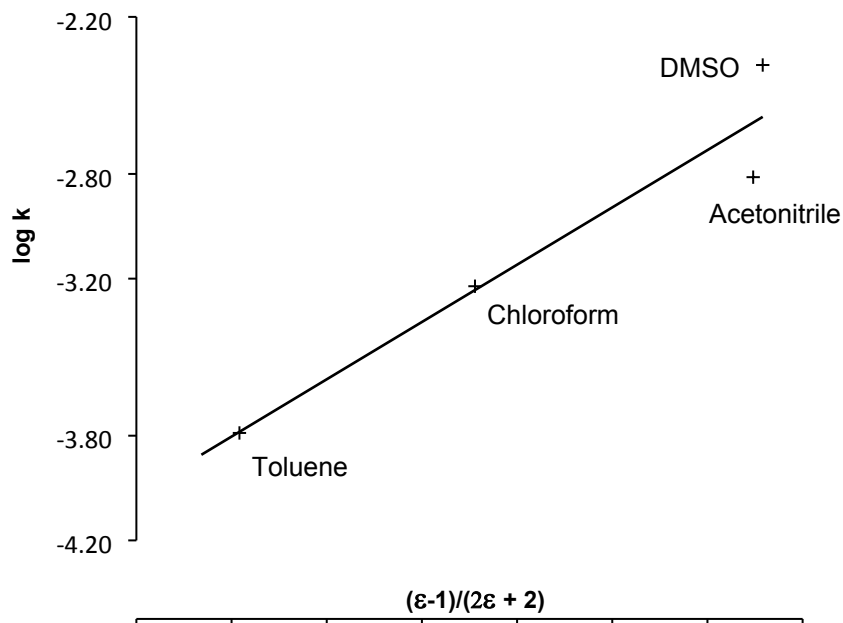

4. Concentration quantification of 48 h aged PADS

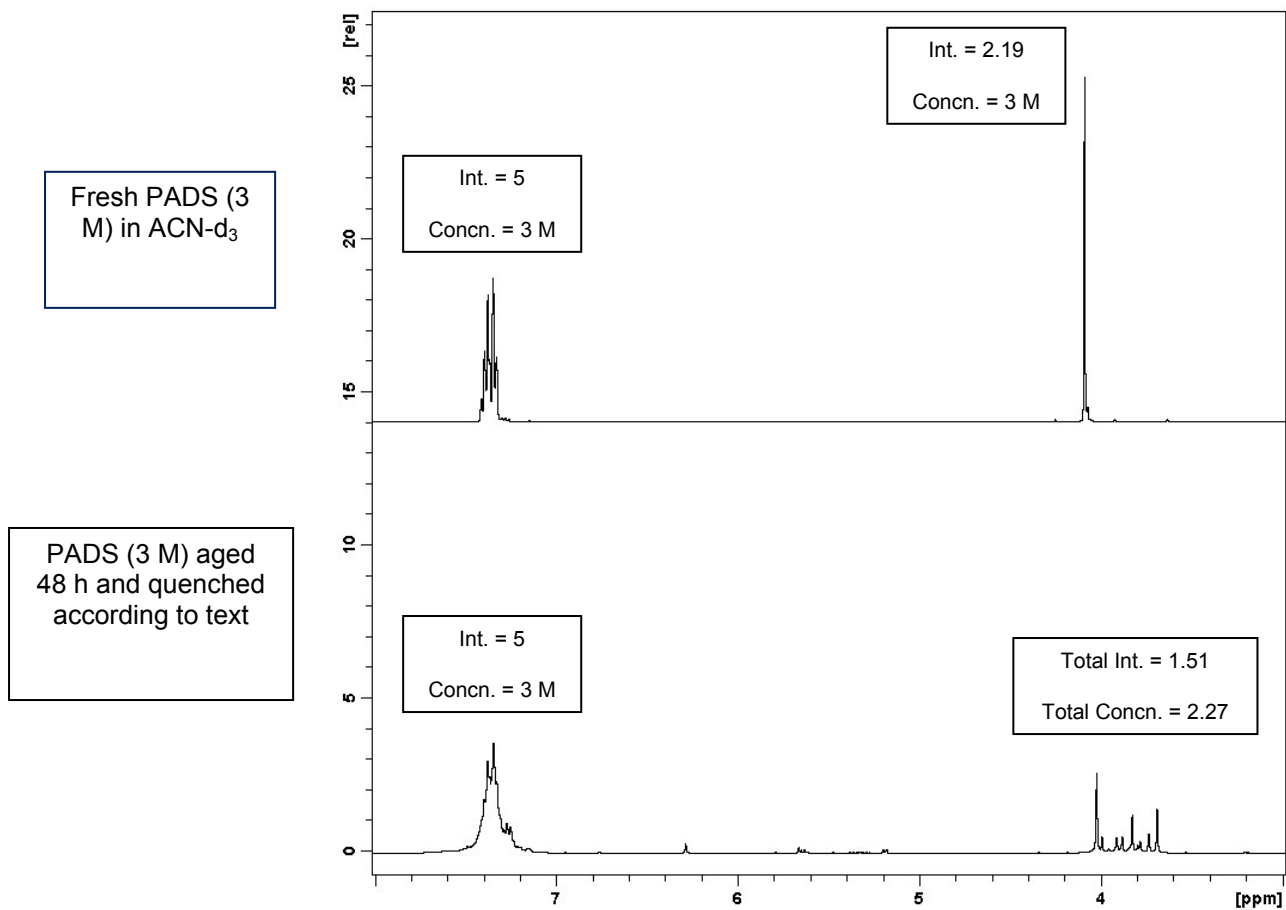

5. Sulfurisation of various substituted aryl phosphites (0.1 M) with fresh PADS (1 M) and 3-picoline (2 M) against substituent Hammett  $\sigma$  value

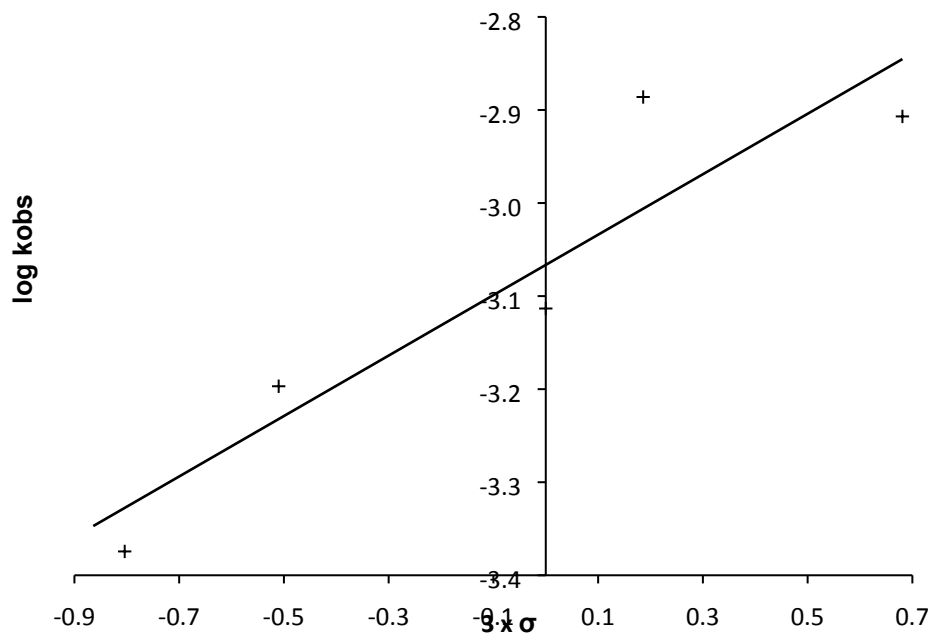

6. Sulfurisation of various substituted aryl phosphites (0.1 M) with PADS (1 M) aged for 18 hours and 3-picoline (2 M) against substituent Hammett  $\sigma$  value

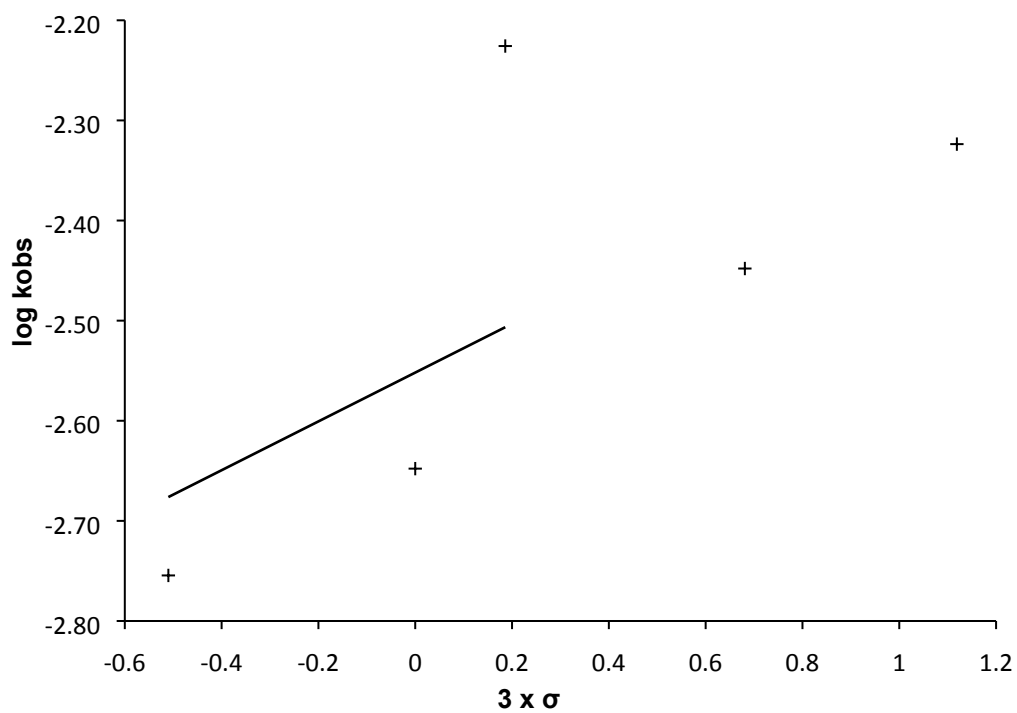

7.  $^1\text{H}$ ,  $^{13}\text{C}$  and  $^{31}\text{P}$  NMR of tris-(4-methoxyphenyl)phosphite

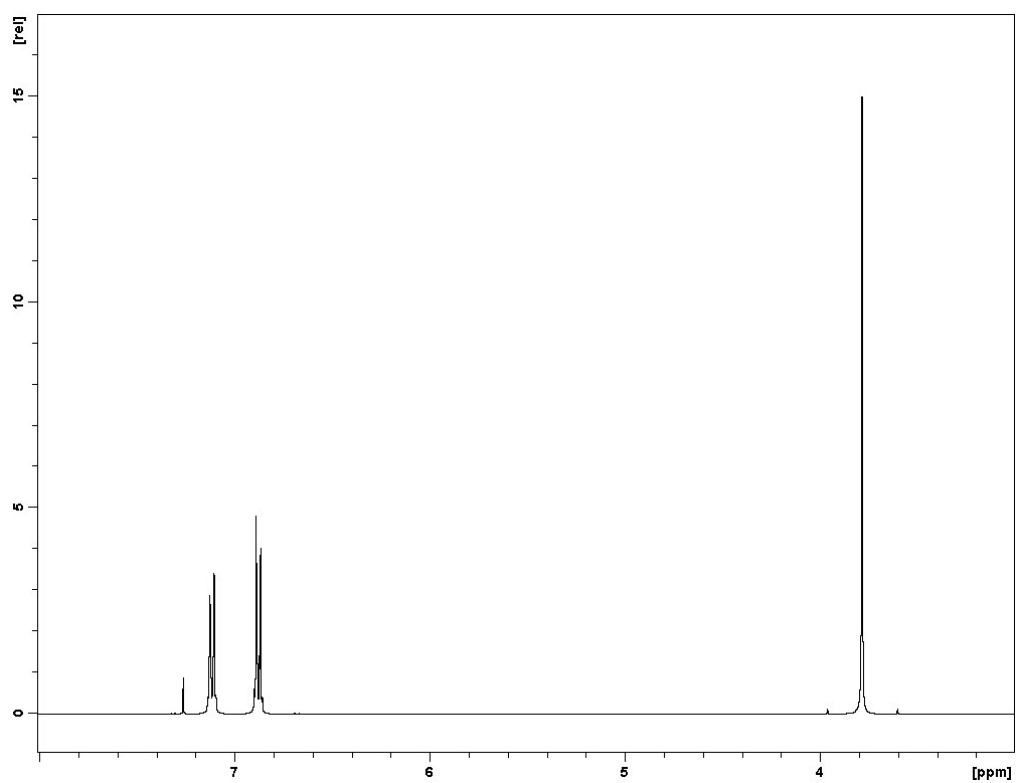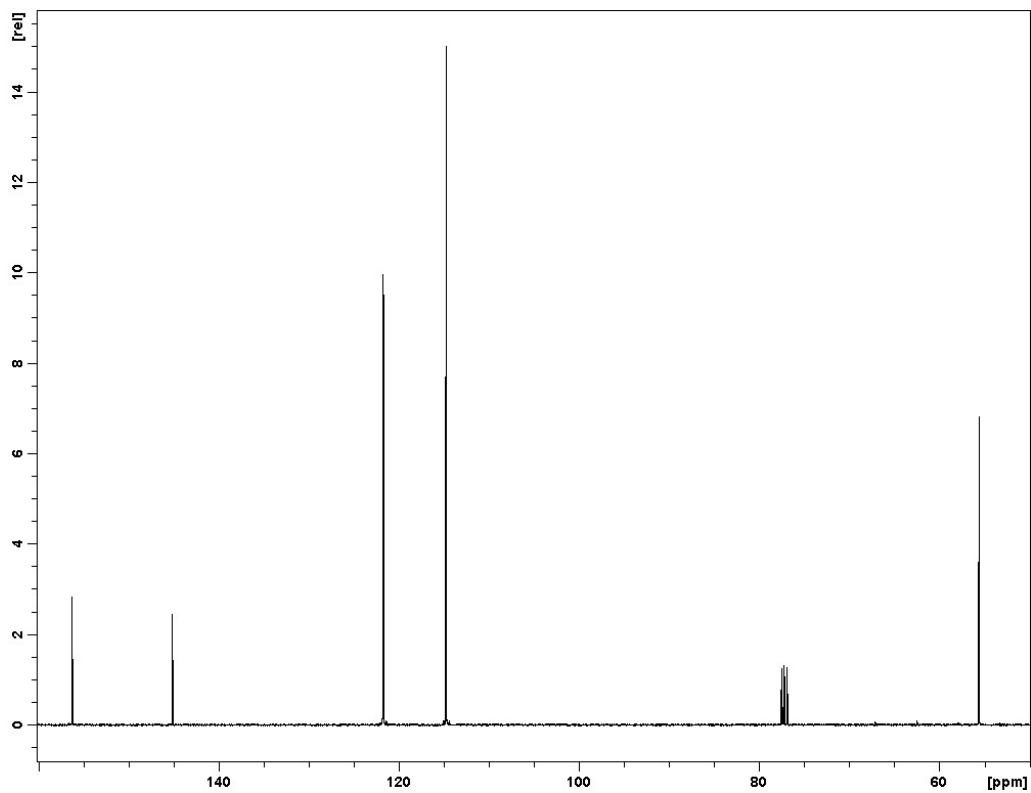

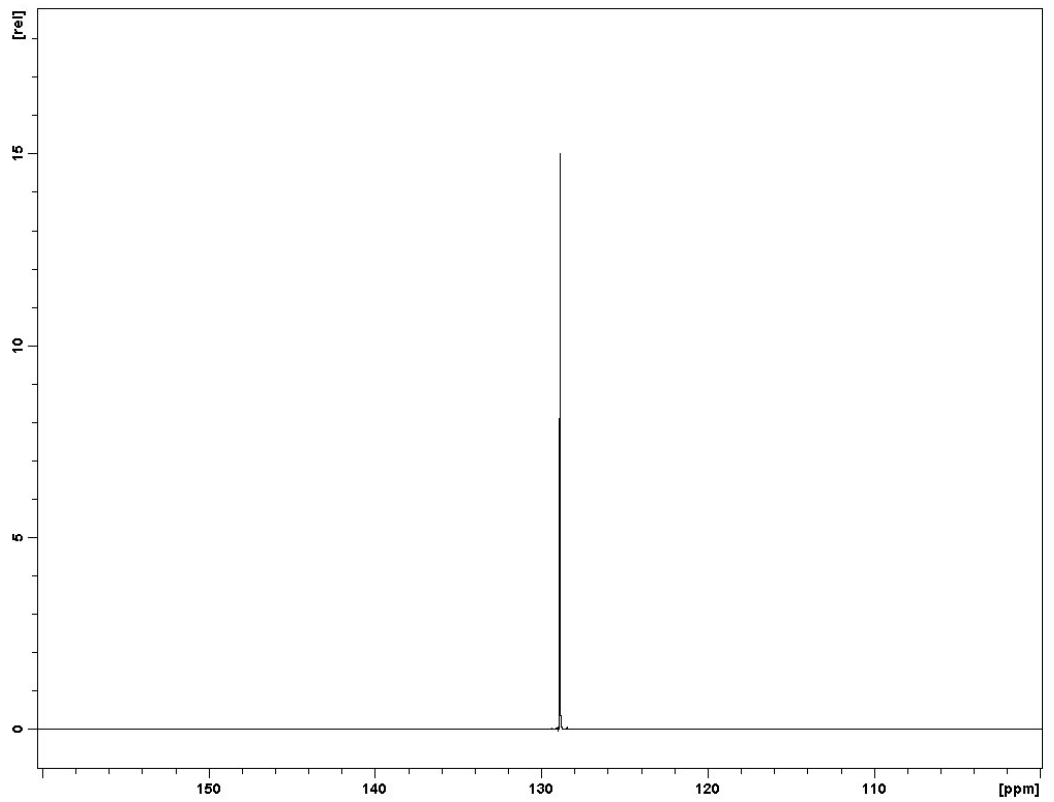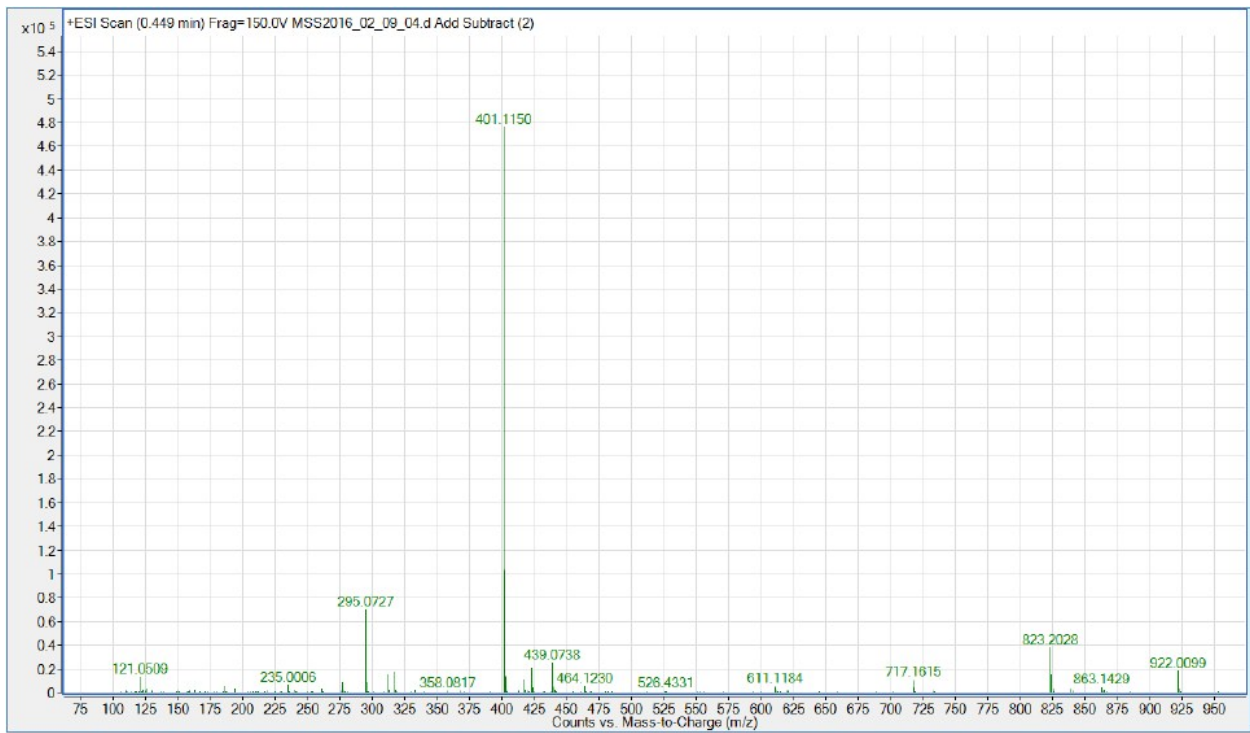

## 8. $^1\text{H}$ , $^{13}\text{C}$ and $^{31}\text{P}$ NMR of tris(3-chlorophenyl)phosphite

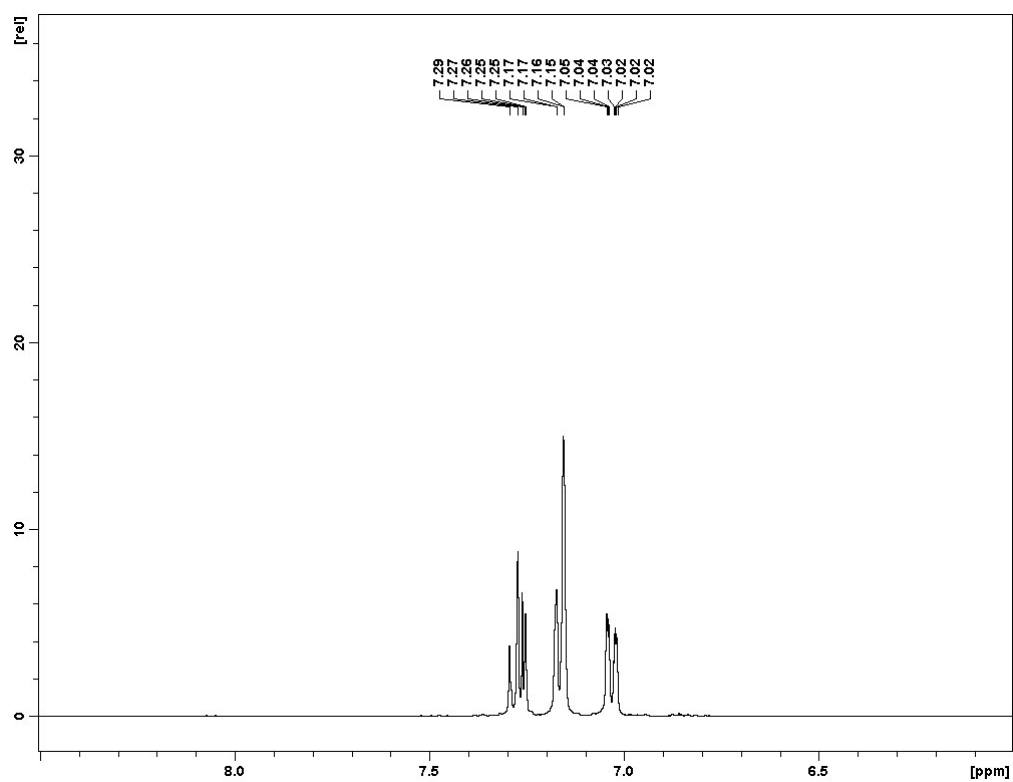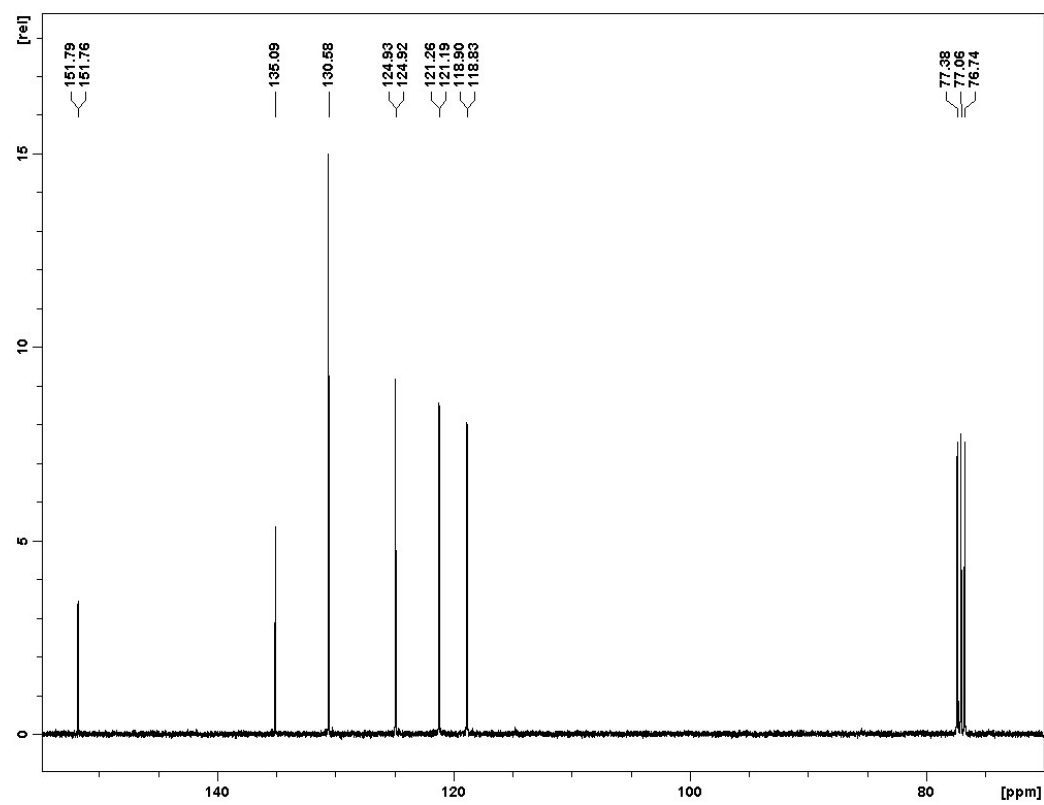

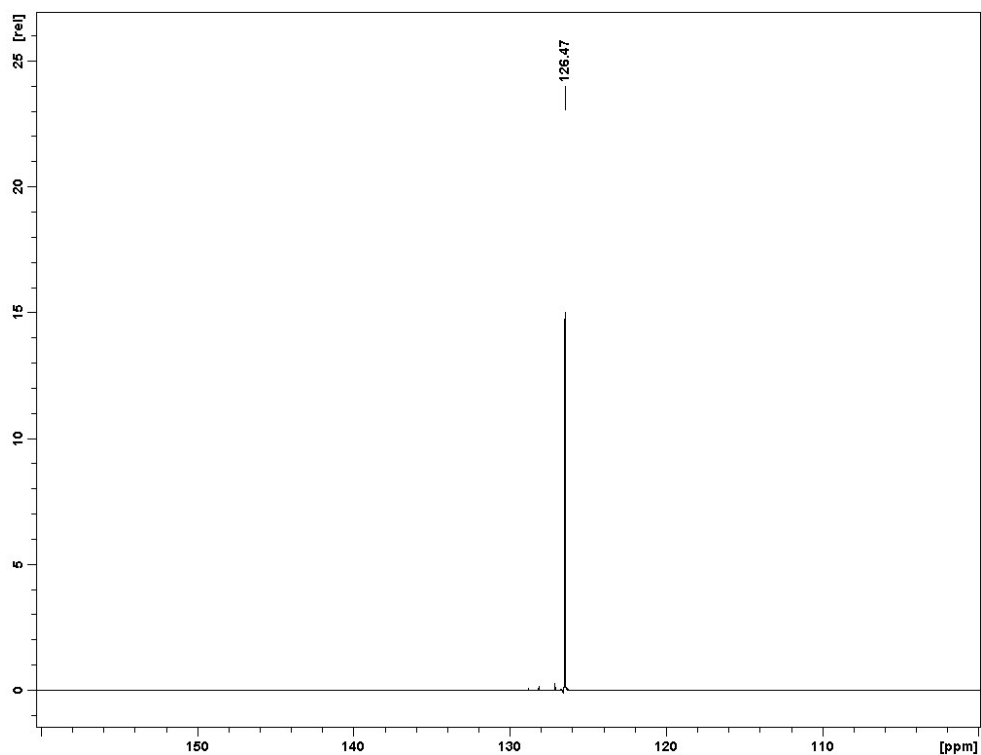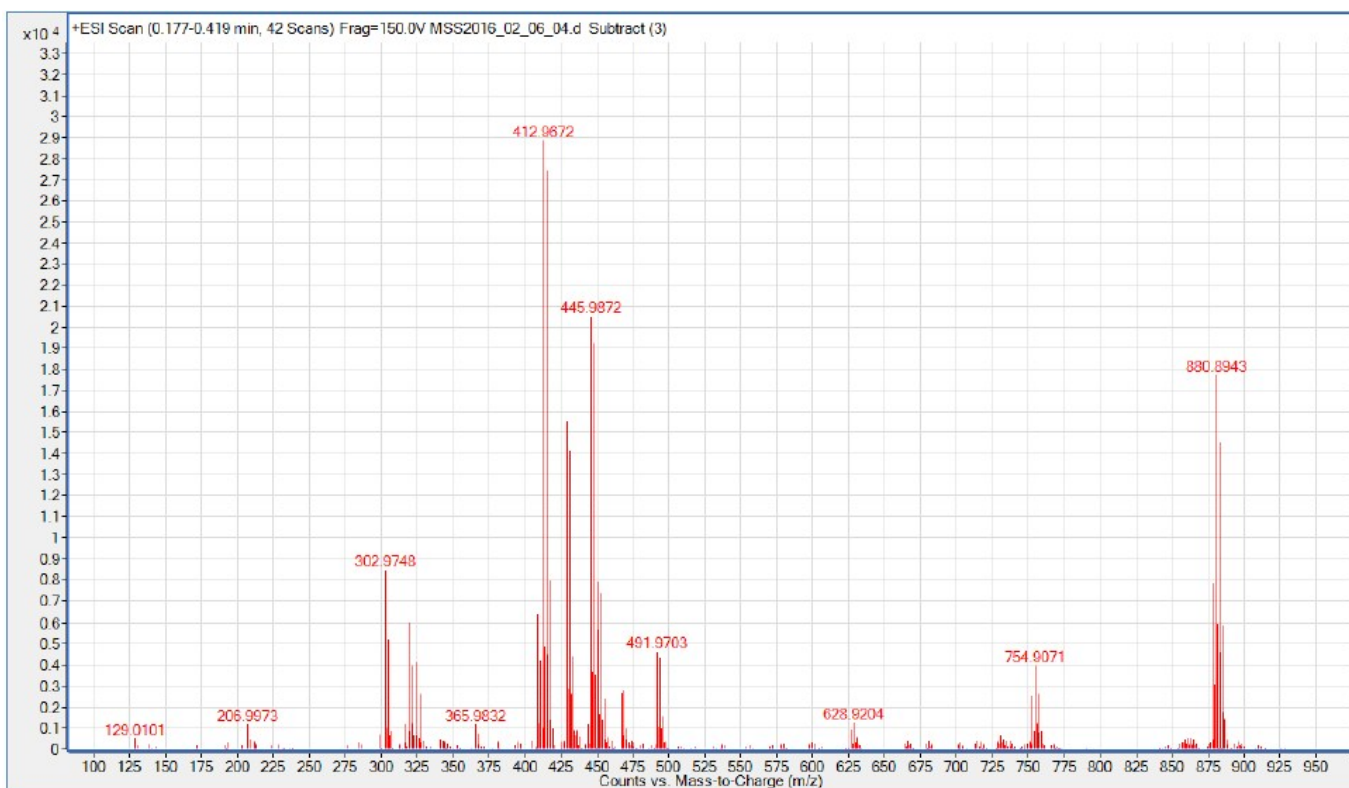



9.  $^1\text{H}$ ,  $^{13}\text{C}$  and  $^{31}\text{P}$  NMR of tris(4-chlorophenyl)phosphite

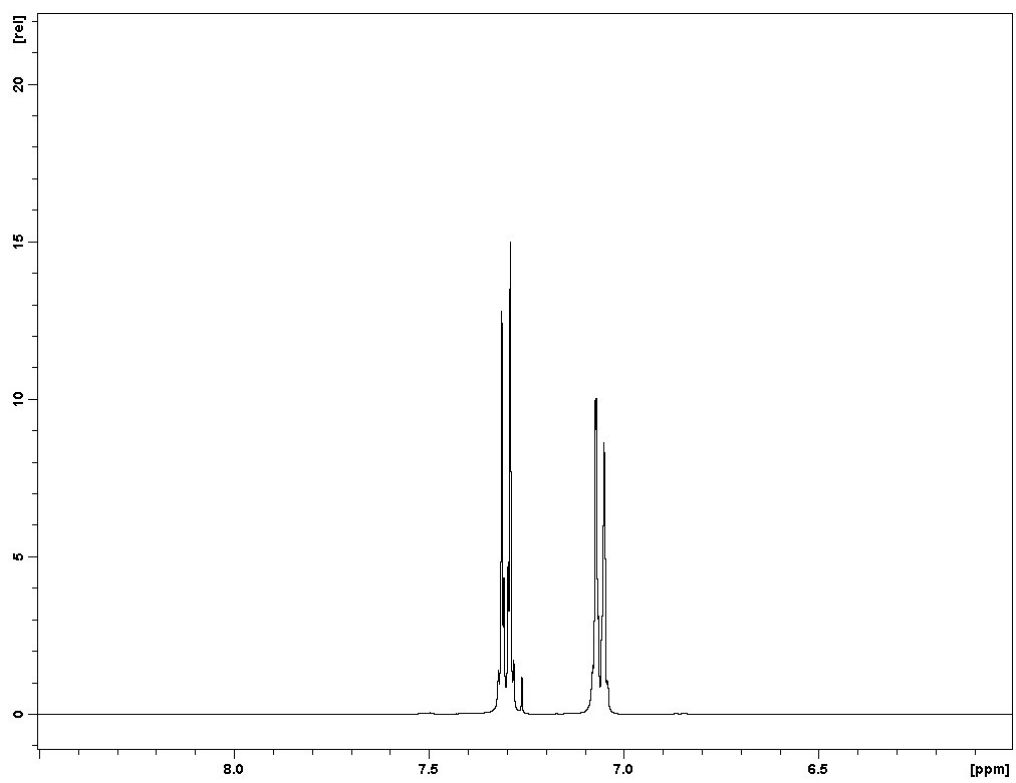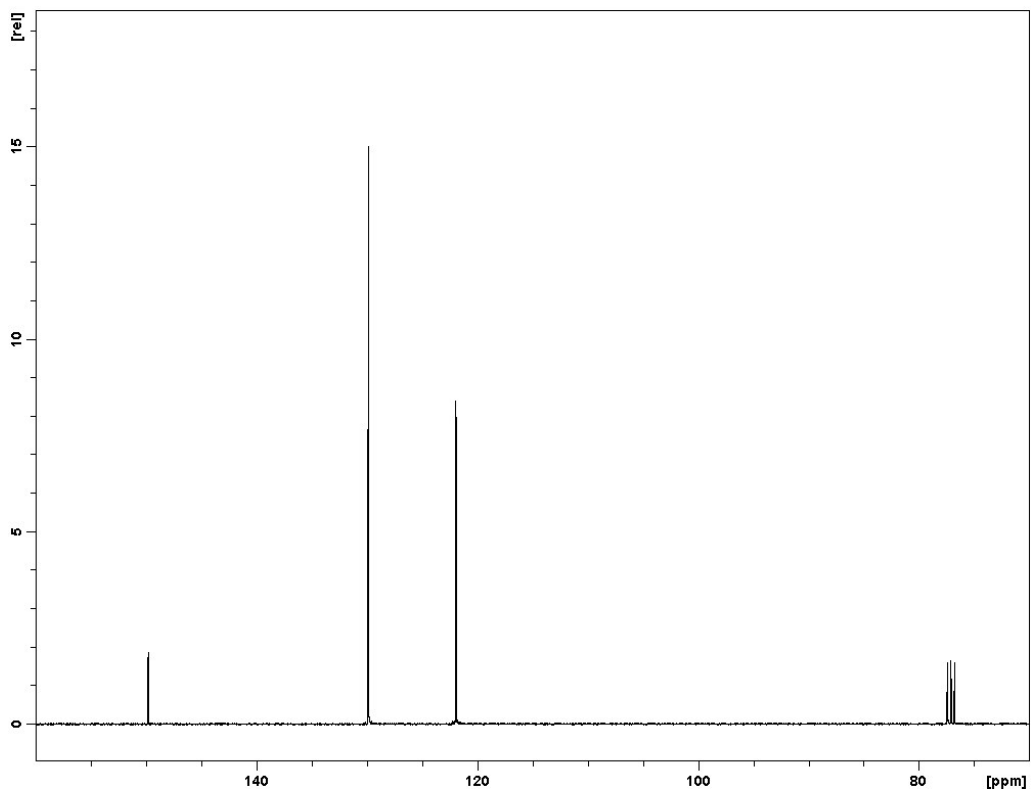

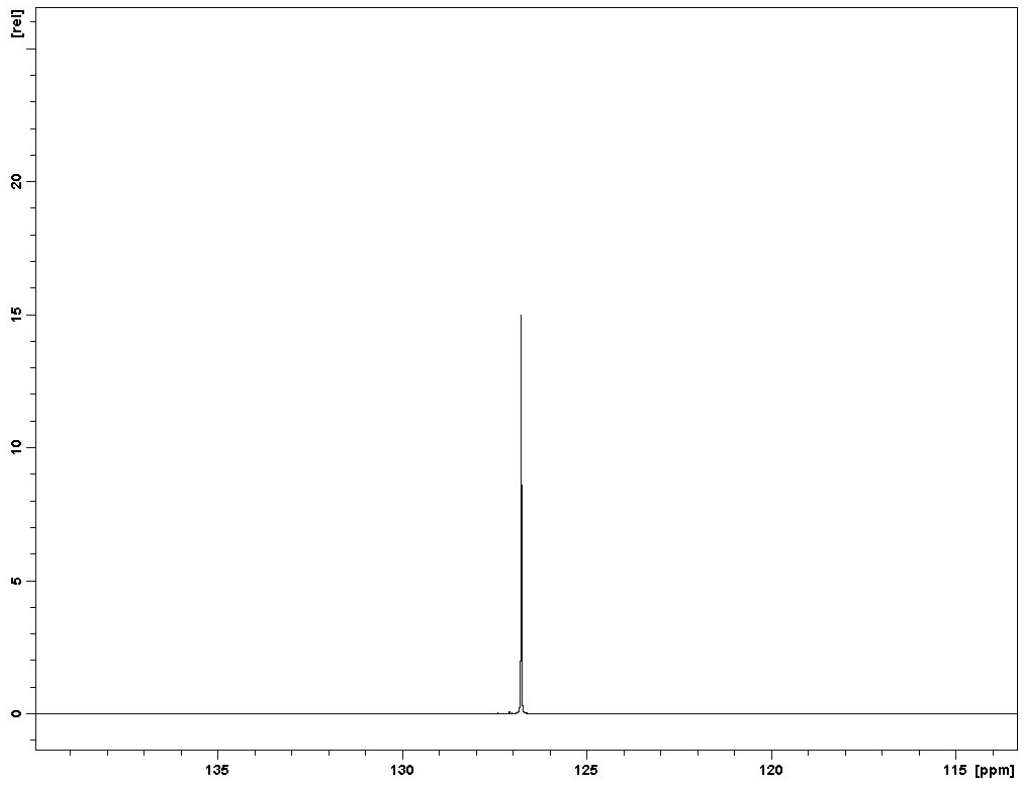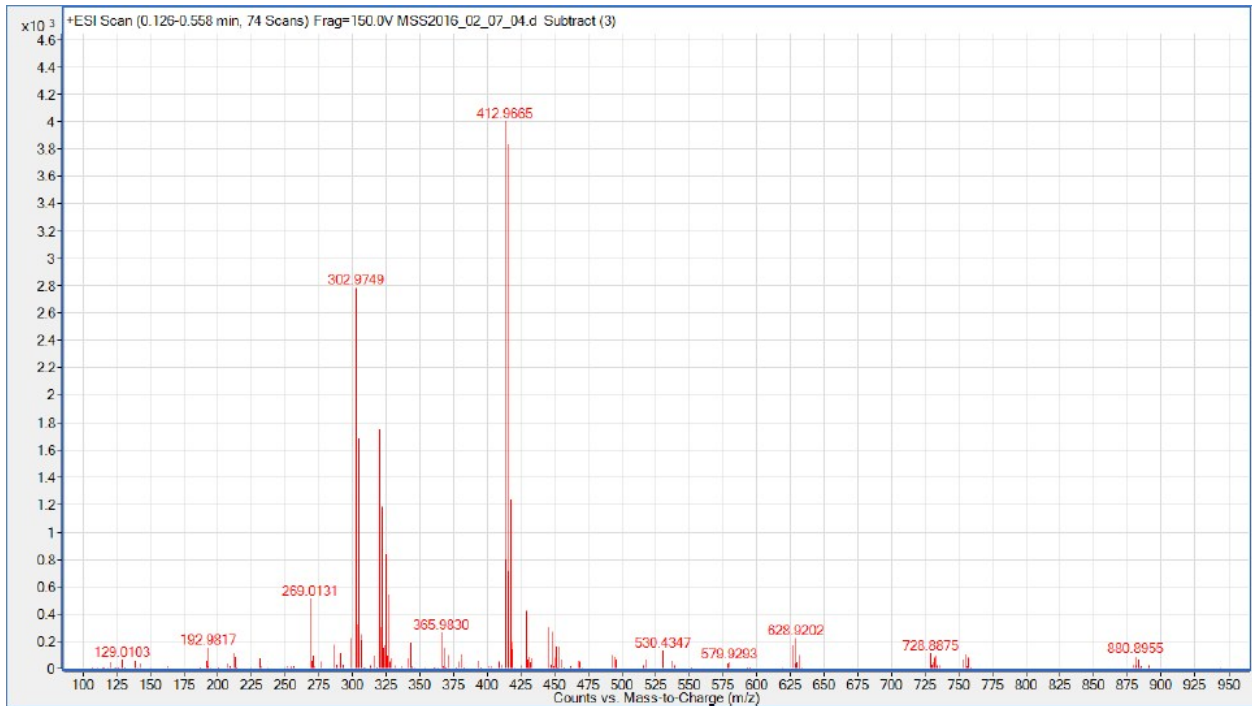

# 10. $^1\text{H}$ , $^{13}\text{C}$ and $^{31}\text{P}$ NMR of tris (4-fluorophenyl)phosphite

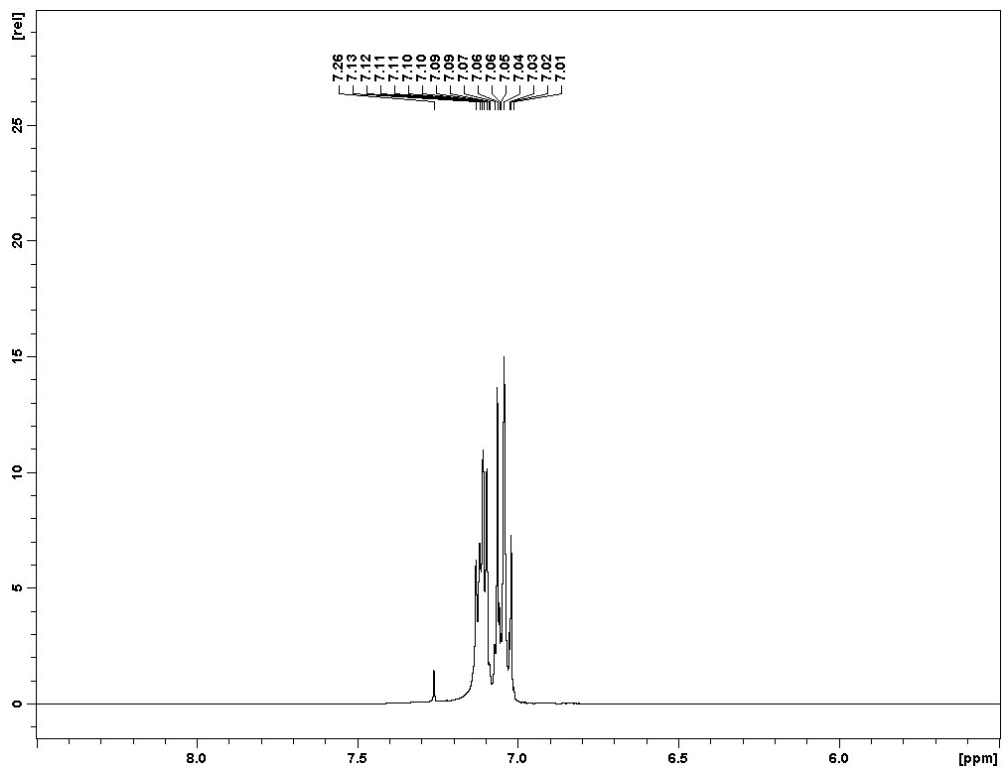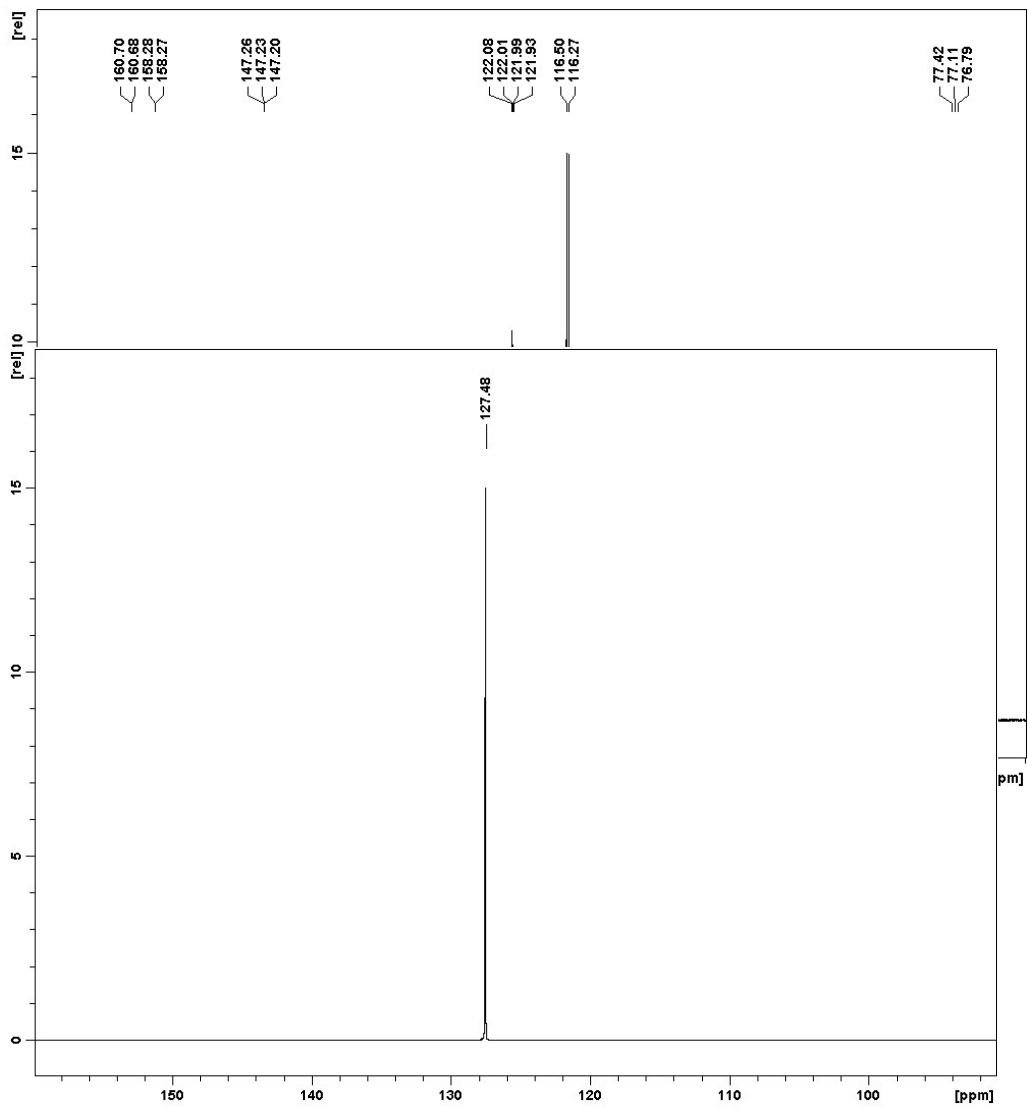

[ppm]

[ppm]

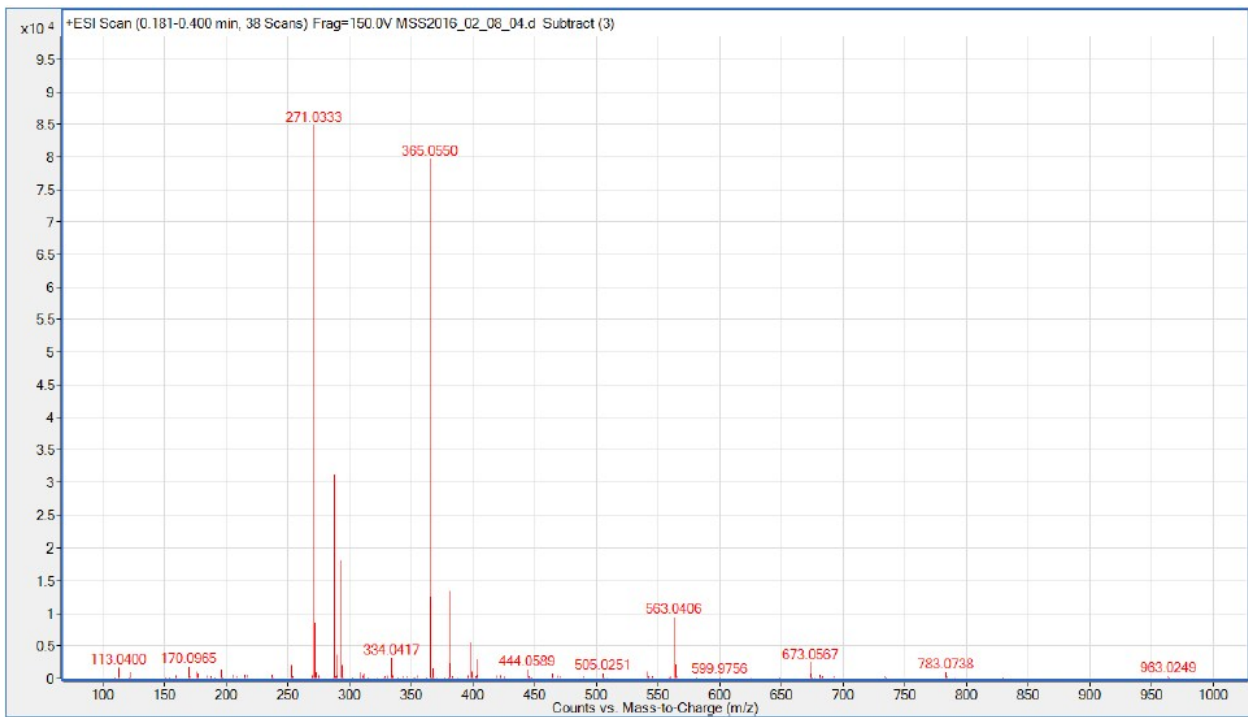

Supplement: c6ob02108e1.pdf [file c6ob02108e1.pdf]
